# Supplementary material for: Assessing the Feasibility and Pre-Post Impact Evaluation of the Beta (Test) Version of the BeUpstanding Champion Toolkit in Reducing Workplace Sitting: Pilot Study
Source: PubMed Central journal article supplement (PMC6334681; doi:10.2196/formative.9343), 2018-08-28
Supplement: formative_v2i2e17_app1.pdf [file formative_v2i2e17_app1.pdf]

**Multimedia Appendix 2.** Baseline levels of the primary and secondary outcomes of the evaluable cases (n = 85)<sup>a</sup>.

|                                                                         | n  | Mean  | SD   |
|-------------------------------------------------------------------------|----|-------|------|
| <b>Work activity</b>                                                    |    |       |      |
| Sitting                                                                 | 85 | 78.7  | 17.1 |
| Standing                                                                | 85 | 12.8  | 15.1 |
| Moving                                                                  | 85 | 8.5   | 6.0  |
| Walking                                                                 | 85 | 8.2   | 5.4  |
| Heavy labor                                                             | 85 | 0.3   | 1.3  |
| <b>Work sitting accumulation</b>                                        |    |       |      |
| Longest continuous sitting bout, min                                    | 85 | 137.4 | 66.7 |
| Prolonged sitting, % of sitting                                         | 85 | 70.3  | 20.2 |
| <b>Before and after work activity, % of nonwork time (on work days)</b> |    |       |      |
| Sitting                                                                 | 85 | 50.9  | 21.3 |
| Standing                                                                | 85 | 17.5  | 12.3 |
| Moving                                                                  | 85 | 31.5  | 17.2 |
| <b>Nonworkday activity, % of nonwork time (on nonwork days)</b>         |    |       |      |
| Sitting                                                                 | 85 | 45.7  | 21.6 |
| Standing                                                                | 85 | 17.0  | 11.0 |
| Moving                                                                  | 85 | 37.3  | 18.4 |
| <b>Desired activity, % of worktime</b>                                  |    |       |      |
| Sitting                                                                 | 84 | 41.6  | 20.6 |
| Standing                                                                | 84 | 30.0  | 16.7 |
| Moving                                                                  | 84 | 28.4  | 16.7 |
| <b>Desired versus performed, absolute difference in % of time</b>       |    |       |      |
| Sitting                                                                 | 84 | 37.2  | 21.0 |
| Standing                                                                | 84 | 18.8  | 15.8 |
| Moving                                                                  | 84 | 20.4  | 15.8 |
| <b>Other outcomes</b>                                                   |    |       |      |
| Strategy usage (% of strategies used at least sometimes)                | 84 | 41.1  | 13.7 |
| Knowledge score, 1 point=5 min incorrect                                | 84 | 5.06  | 8.80 |
| Control over sitting and standing (1-5)                                 | 84 | 3.05  | 1.35 |
| Support (1-5)                                                           | 84 | 3.68  | 1.08 |
| Job performance (1-10)                                                  | 82 | 7.75  | 1.16 |
| Job satisfaction (1-10)                                                 | 82 | 7.38  | 1.81 |
| Self-rated health (1-5)                                                 | 82 | 3.22  | 1.05 |
| Energy (1-4)                                                            | 82 | 2.45  | 0.77 |
| Stress (1-4)                                                            | 82 | 3.16  | 0.73 |

<sup>a</sup>Table reports mean and SD corrected for clustering (linearized variance estimation).
