# Supplementary material for: Assessing the Feasibility and Pre-Post Impact Evaluation of the Beta (Test) Version of the BeUpstanding Champion Toolkit in Reducing Workplace Sitting: Pilot Study
Source: PubMed Central journal article supplement (PMC6334681; doi:10.2196/formative.9343), 2018-08-28
Supplement: formative_v2i2e17_app3.pdf [file formative_v2i2e17_app3.pdf]

**Multimedia Appendix 1.** Strategies to sit less and move more at work that were used at least “sometimes.”

| <b>Strategy</b>                                                                      | <b>Baseline<br/>n=212<sup>a</sup><br/>n (%)</b> | <b>Follow-up<br/>n=156<sup>a</sup><br/>n (%)</b> | <b>Change<br/>n=79<sup>b</sup><br/>%</b> |
|--------------------------------------------------------------------------------------|-------------------------------------------------|--------------------------------------------------|------------------------------------------|
| Stood up during a meeting                                                            | 64 (30.2%)                                      | 65 (41.7%)                                       | <b>+10.1%</b>                            |
| Stood up when the phone rang                                                         | 86 (40.6%)                                      | 68 (43.6%)                                       | +7.6%                                    |
| Walked to colleague rather than emailing/phoning                                     | 206 (97.2%)                                     | 152 (97.4%)                                      | 0.0%                                     |
| Ate my lunch away from my desk                                                       | 152 (71.7%)                                     | 123 (78.8%)                                      | +7.6%                                    |
| Walked to printer further away                                                       | 120 (56.6%)                                     | 94 (60.3%)                                       | +3.8%                                    |
| Walked to bathroom further away                                                      | 110 (51.9%)                                     | 84 (53.8%)                                       | +2.5%                                    |
| Used the stairs instead of the lift                                                  | 69 (32.5%)                                      | 65 (41.7%)                                       | <b>+11.4%</b>                            |
| Went for a walk/did activity during lunch break                                      | 155 (73.1%)                                     | 117 (75.0%)                                      | 0.0%                                     |
| Had a walking meeting                                                                | 7 (3.3%)                                        | 17 (10.9%)                                       | 0.0%                                     |
| Participated in activity class at my workplace                                       | 16 (7.5%)                                       | 15 (9.6%)                                        | -3.8%                                    |
| Used prompts at desk/around the office to remind me to stand up, sit less, move more | 34 (16.0%)                                      | 53 (34.0%)                                       | <b>+24.1%</b>                            |
| Used an activity tracker/wearable device to track activity and/or sitting time       | 60 (28.3%)                                      | 54 (34.6%)                                       | <b>+25.3%</b>                            |
| Used a height-adjustable desk to alternate postures                                  | 59 (27.8%)                                      | 46 (29.5%)                                       | +8.9%                                    |

<sup>a</sup>All participants who reported on strategies at baseline (n=212) or follow-up (n=156).

<sup>b</sup>Change within evaluable cases who reported on strategies at baseline and follow-up (n=79).
