# Supplementary material for: Assessing the Feasibility and Pre-Post Impact Evaluation of the Beta (Test) Version of the BeUpstanding Champion Toolkit in Reducing Workplace Sitting: Pilot Study
Source: PubMed Central journal article supplement (PMC6334681; doi:10.2196/formative.9343), 2018-08-28
Supplement: formative_v2i2e17_app4.pdf [file formative_v2i2e17_app4.pdf]

**Multimedia Appendix 3.** Intraclass correlation for change in primary and secondary outcomes and responsiveness measures.

| Outcome                                | Intraclass correlation (ICC) |                            |                            | SES <sup>a</sup> | SRM <sup>b</sup> |
|----------------------------------------|------------------------------|----------------------------|----------------------------|------------------|------------------|
|                                        | ICC                          | Lower 95% Confidence Limit | Upper 95% Confidence Limit |                  |                  |
| <b>Work activity</b>                   |                              |                            |                            |                  |                  |
| Sitting                                | 0.068                        | 0.007                      | 0.416                      | -0.40            | -0.36            |
| Standing                               | 0.073                        | 0.010                      | 0.390                      | 0.19             | 0.18             |
| Moving                                 | <0.001                       | <0.001                     | <0.001                     | 0.52             | 0.44             |
| Walking                                | <0.001                       | <0.001                     | <0.001                     | 0.53             | 0.40             |
| Heavy labor                            | <0.001                       | <0.001                     | <0.001                     | 0.16             | 0.17             |
| <b>Work sitting accumulation</b>       |                              |                            |                            |                  |                  |
| Longest continuous sitting bout, min   | <0.001                       | <0.001                     | <0.001                     | -0.20            | -0.19            |
| Prolonged sitting, % of sitting        | <0.001                       | <0.001                     | <0.001                     | -0.43            | -0.37            |
| <b>Before and after work activity</b>  |                              |                            |                            |                  |                  |
| Sitting                                | <0.001                       | <0.001                     | <0.001                     | -0.25            | -0.26            |
| Standing                               | <0.001                       | <0.001                     | <0.001                     | 0.04             | 0.01             |
| Moving                                 | <0.001                       | <0.001                     | <0.001                     | 0.27             | 0.28             |
| <b>Nonworkday activity</b>             |                              |                            |                            |                  |                  |
| Sitting                                | <0.001                       | <0.001                     | <0.001                     | -0.23            | -0.21            |
| Standing                               | <0.001                       | <0.001                     | <0.001                     | 0.10             | 0.07             |
| Moving                                 | <0.001                       | <0.001                     | <0.001                     | 0.19             | 0.18             |
| <b>Desired activity</b>                |                              |                            |                            |                  |                  |
| Sitting                                | <0.001                       | <0.001                     | 0.000                      | 0.00             | 0.00             |
| Standing                               | 0.089                        | 0.004                      | 0.689                      | 0.14             | 0.12             |
| Moving                                 | <0.001                       | <0.001                     | 0.995                      | -0.12            | -0.12            |
| <b>Gap scores<sup>c</sup></b>          |                              |                            |                            |                  |                  |
| Sitting                                | 0.132                        | 0.022                      | 0.507                      | -0.30            | -0.34            |
| Standing                               | 0.203                        | 0.036                      | 0.632                      | 0.05             | 0.04             |
| Moving                                 | 0.036                        | 0.002                      | 0.481                      | -0.34            | -0.33            |
| <b>Other outcomes</b>                  |                              |                            |                            |                  |                  |
| Strategy usage (% of strategies)       | 0.002                        | <0.001                     | 1.000                      | 0.53             | 0.44             |
| Knowledge score, 1 point = 5 min error | 0.028                        | <0.001                     | 0.757                      | -0.04            | -0.03            |
| Control over sitting and standing 1-5  | 0.079                        | 0.006                      | 0.533                      | 0.04             | 0.05             |
| Support 1-5                            | 0.183                        | 0.035                      | 0.584                      | 0.13             | 0.14             |
| Job performance 1-10                   | <0.001                       | <0.001                     | <0.001                     | -0.07            | -0.08            |
| Job satisfaction 1-10                  | <0.001                       | <0.001                     | <0.001                     | -0.02            | -0.03            |
| Self-rated health 1-5                  | 0.039                        | <0.001                     | 0.972                      | 0.06             | 0.06             |
| Energy 1-4                             | 0.004                        | <0.001                     | 1.000                      | 0.18             | 0.18             |
| Stress 1-4                             | 0.080                        | 0.004                      | 0.635                      | 0.02             | 0.02             |

<sup>a</sup>Standardized effect size (SES) = mean change/SD at baseline. Mean change and baseline SD were calculated as reported in Table 5. Larger absolute values of SES indicate better responsiveness to change.

<sup>b</sup>SRM = standardized response mean: change/SD of change. Mean and SD of change scores were calculated using linearized variance estimation. Larger absolute values of SRM indicate better responsiveness to change.

<sup>c</sup>Gap scores = absolute value of difference between desired and performed activity at work.
